# Supplementary material
Source: Springer Nature journal article supplement (https://www.springermedizin.de/resource/supplementary/13058_2012_3227_MOESM9_ESM.pdf/9703542)

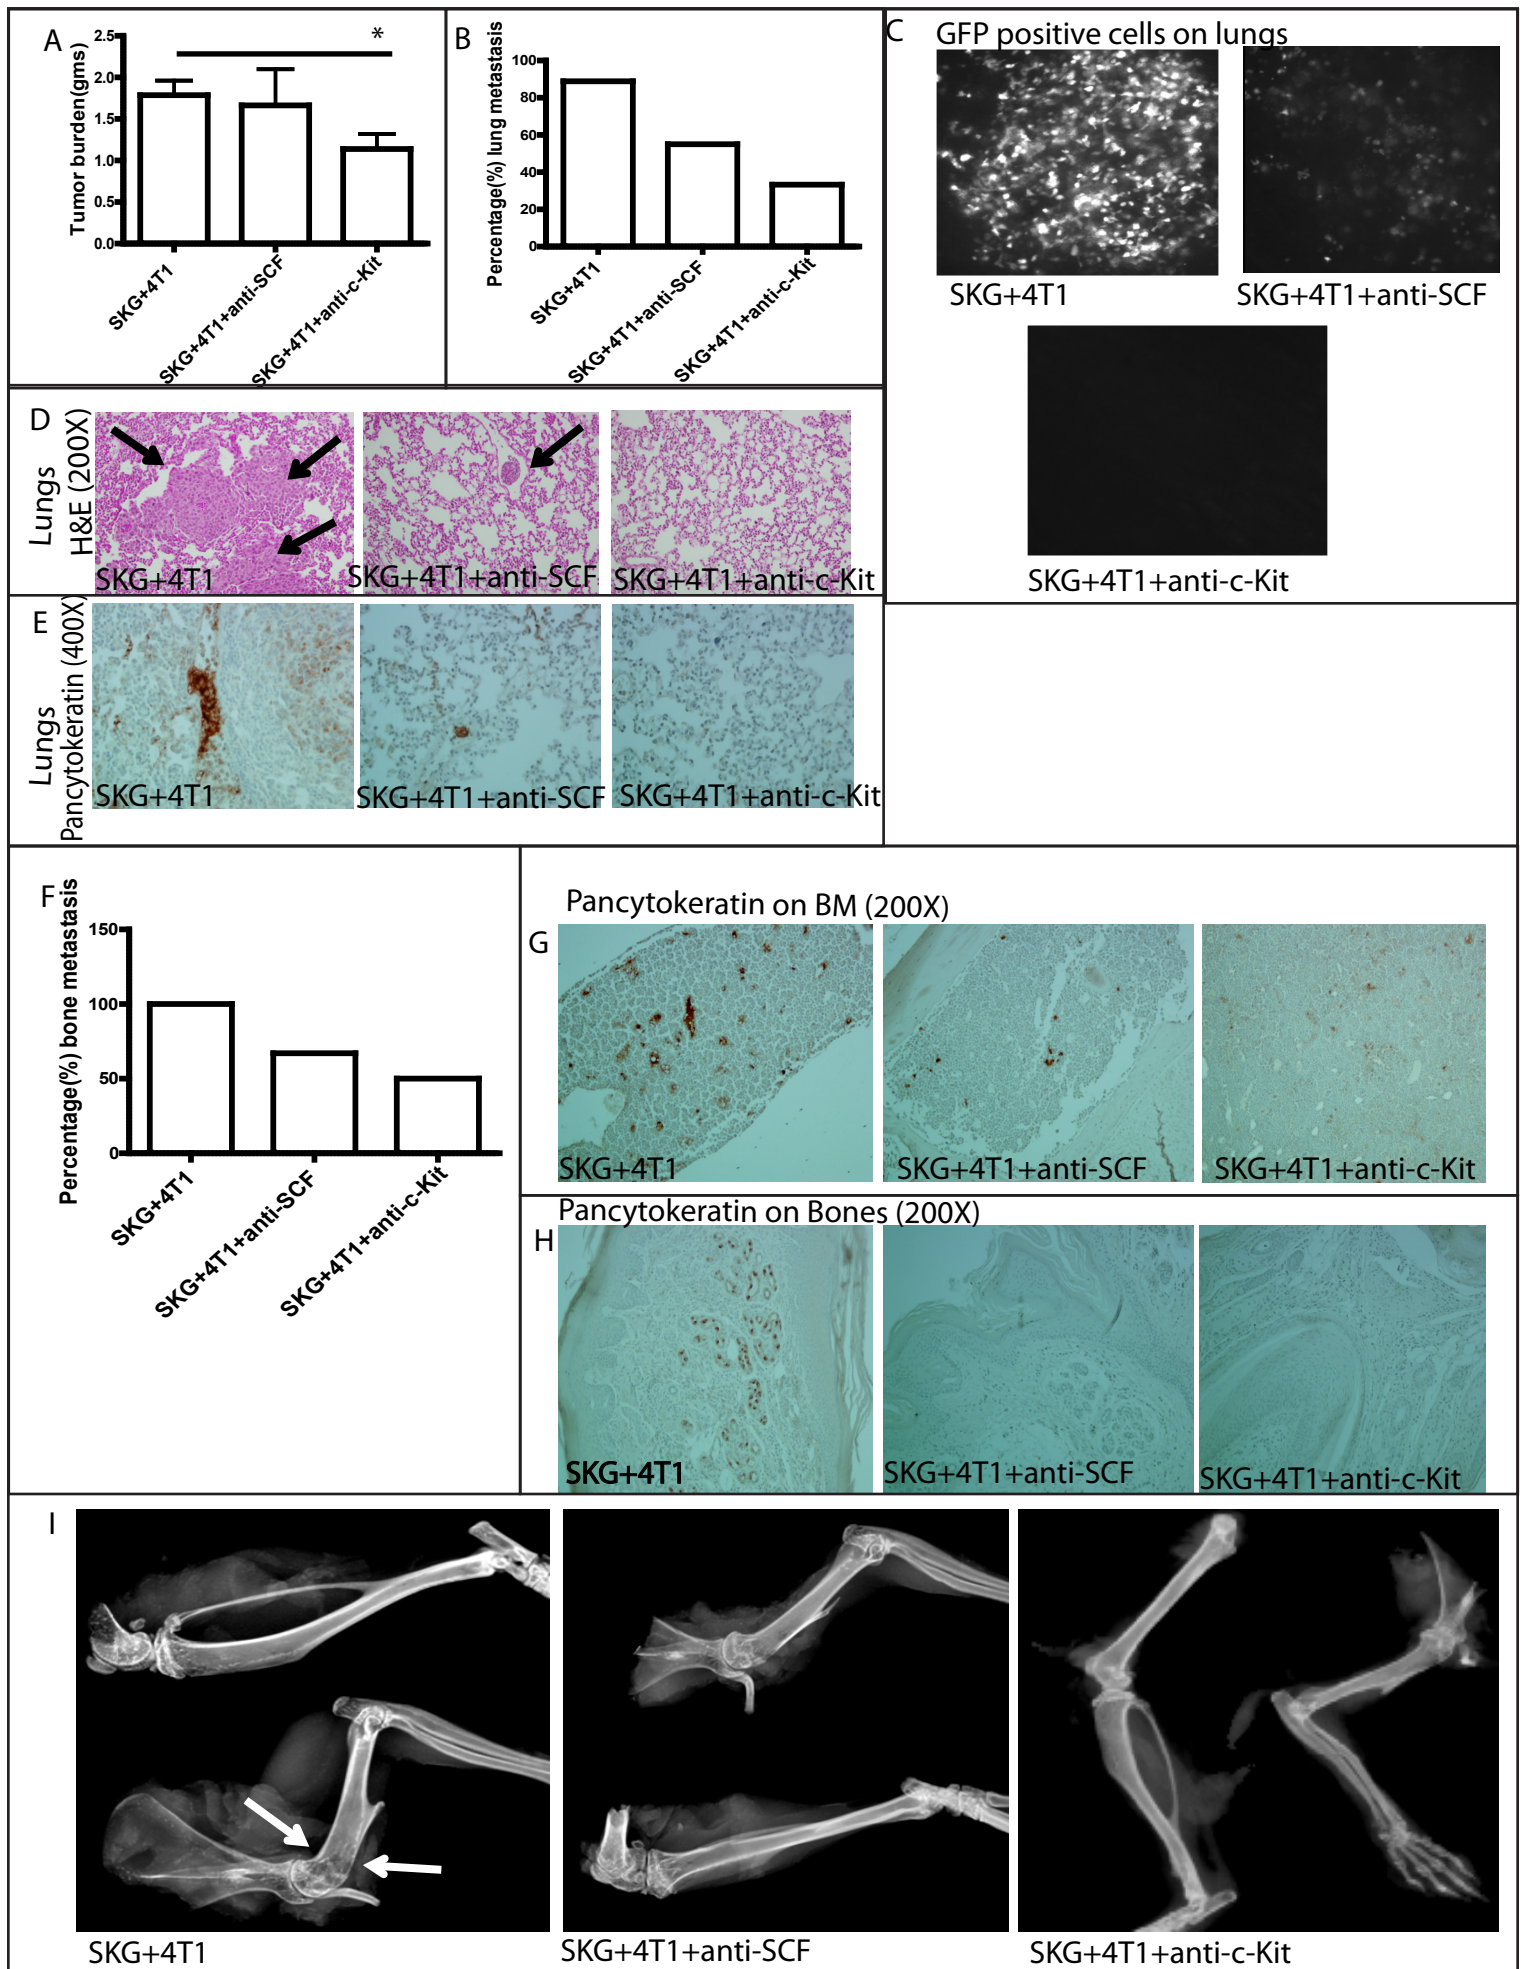

Supplement: MOESM9 [file 9703542]
